# Supplementary material for: Facile synthesis of graphene supported ultralong TiO2 nanofibers from the commercial titania for high performance lithium-ion batteries
Source: Royal Society of Chemistry journal article supplement (doi:10.1039/c5ta00523j), 2015-01-01
Supplement: c5ta00523j1.pdf [file c5ta00523j1.pdf]

**Supporting Information**

**Facile Synthesis of Graphene Supported Ultralong TiO<sub>2</sub>  
Nanofibers from the Commercial Titania for High  
Performance Lithium-Ion Batteries**

*Guifang Gu<sup>a</sup>, Jianli Cheng<sup>a,b,\*</sup>, Xiaodong Li<sup>a</sup>, Wei Ni<sup>a</sup>, Qun Guan<sup>a</sup>, Guoxing Qu<sup>a</sup>,  
Bin Wang<sup>a\*</sup>*

*<sup>a</sup> Institute of Chemical Materials, China Academy of Engineering Physics, Mianyang  
621900, Sichuan, P.R. China.*

*<sup>b</sup> State Key Laboratory of Molecular Engineering of Polymers (Fudan University)*

\*Address correspondence to [binwang@caep.cn](mailto:binwang@caep.cn); [edward.bwang@gmail.com](mailto:edward.bwang@gmail.com); Fax:

(+86)816-2544 426.

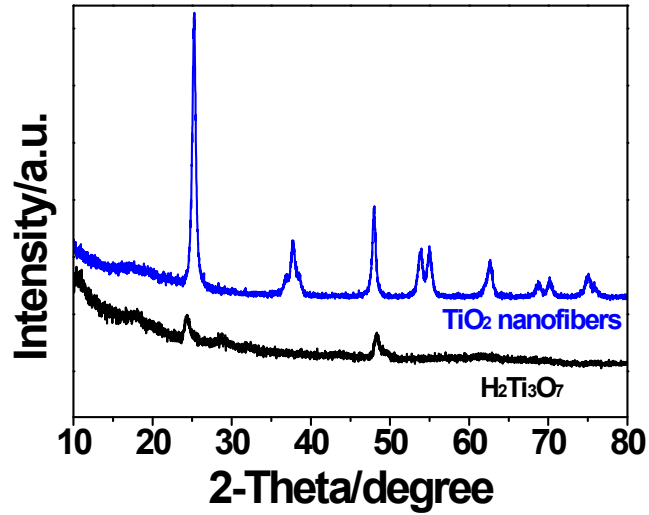

**Fig. S1** XRD pattern of the pristine TiO<sub>2</sub> nanofibers and its precursor.

After the hydrothermal reaction and the followed acid wash process, the commercial TiO<sub>2</sub> particles transform to H<sub>2</sub>Ti<sub>3</sub>O<sub>7</sub>. The addition of GO worked as the substrate to nucleation of the Ti-precursor. The obtained XRD pattern of TiO<sub>2</sub> nanofibers can be attributed to anatase TiO<sub>2</sub> (JCPDS 21-1272).

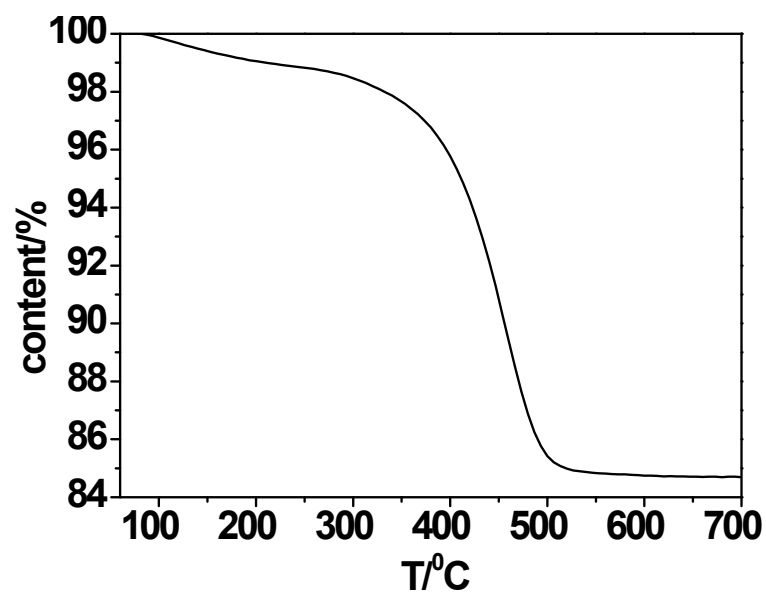

**Fig. S2** TGA curve of the as-prepared G- UTNF nanocomposite.

The weight percentage of graphene in the G- UTNF was estimated using a thermogravimetric analysis (TGA) at a heating rate of 20 °C min<sup>-1</sup> from room temperature to 700 °C under airflow. The weight loss between 300 °C and 500 °C is ascribed to the burning of graphene. The total graphene content is about 13.5 wt%.

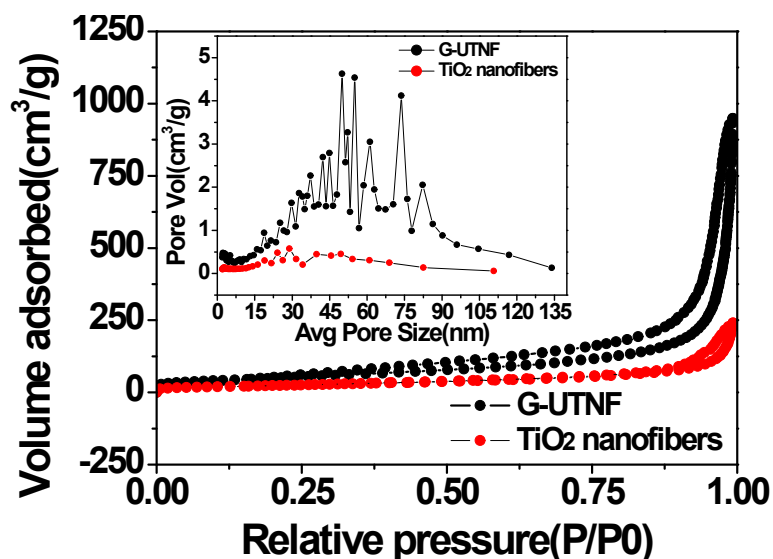

Fig. S3 N<sub>2</sub> adsorption and desorption isotherm curves and pore size distributions (the inset) of the G- UTNF and pristine TiO<sub>2</sub> nanofibers.

Fig. S3 shows the N<sub>2</sub> adsorption-desorption isotherm curves of the G- UTNF and TiO<sub>2</sub> nanofibers by a multi-point Brunauer–Emmett–Teller (BET) method. The G-UTNF has a specific surface area of 185 m<sup>2</sup> g<sup>-1</sup>, which is higher than that of TiO<sub>2</sub> nanofibers (125 m<sup>2</sup> g<sup>-1</sup>). The pore size distributions were calculated from the desorption branch of the N<sub>2</sub> adsorption-desorption isotherm curves on the basis of the Barrett–Joyner–Halenda (BJH) model. The calculated average pore size for G- UTNF and TiO<sub>2</sub> nanofibers (Fig. S3 inset) were 15.5 and 13.1 nm, respectively. The total pore volume of G- UTNF and TiO<sub>2</sub> nanofibers were found to be 1.515 and 0.376 cm<sup>3</sup> g<sup>-1</sup>, respectively.

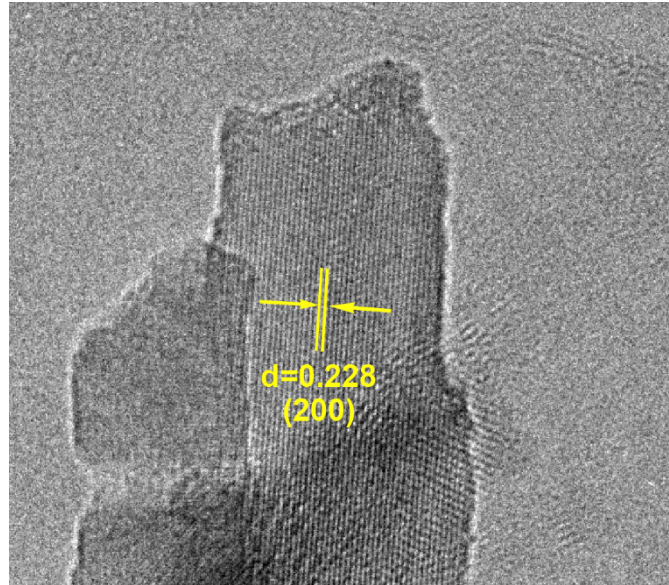

**Fig. S4** HR-TEM image of G- UTNF.

The interplanar distance between adjacent lattice planes is 0.228 nm, which corresponds to the (200) plane of rutile  $\text{TiO}_2$  crystal.

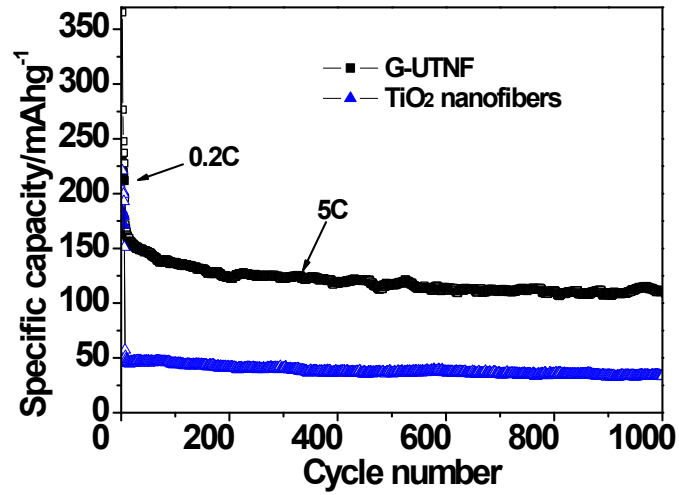

**Fig. S5** Cycling performance of the G- UTNF electrode and TiO<sub>2</sub> nanofibers electrode at 5 C.

Figure S5 shows the cycling performance at high current rate of 5 C of the G- UTNF electrode, and the TiO<sub>2</sub> nanofibers electrode. It can be clearly seen that the charge capacities of G- UTNF electrode are much higher than that of TiO<sub>2</sub> nanofibers electrode. Both of them are demonstrated with excellent cycling stability.
